# Supplementary material
Source: Springer Nature journal article supplement (https://www.springermedizin.de/resource/supplementary/12936_2012_2124_MOESM1_ESM.pdf/9542750)
Supplement: MOESM1 [file 9542750]

TTTTCTTTAATACTTTTTCCAGATAATGTG **GATAGATTCCCCGACCATGAT**CTGCCAAGATGGAAT

**F3**

TTTACAGATTTTCAT GCATTCCTTCATGATTGTGTTCCGTGTGCTATGCGGAGAATG GATTGAATCAA

**F2**

**F1c**

TGTGGGATTGTATGCTTGTCCGGTGATGTATCCTGCATACCATTTTTCTTGGCCACTGTAGTGATAGG

**B1c**

AAATTT(**AT**)GTCGTAAGTAATGCAAATTA ACATGGACCAAGATCGTTTTTACATGACATTGTTTTGC

**B2**

**B3**

AGGTGCTTAACCTTTTTCTTAGCCTTGCTTTTTGTCAAATTTTGGTTCATCATCCTTGTCTG **CACCAACG**

**GCAGATAATGAG**ACCAACAAGATTGCAGAAGCGTTCAACAGAATATCA
